# Supplementary material
Source: PubMed Central journal article supplement (PMC152986)

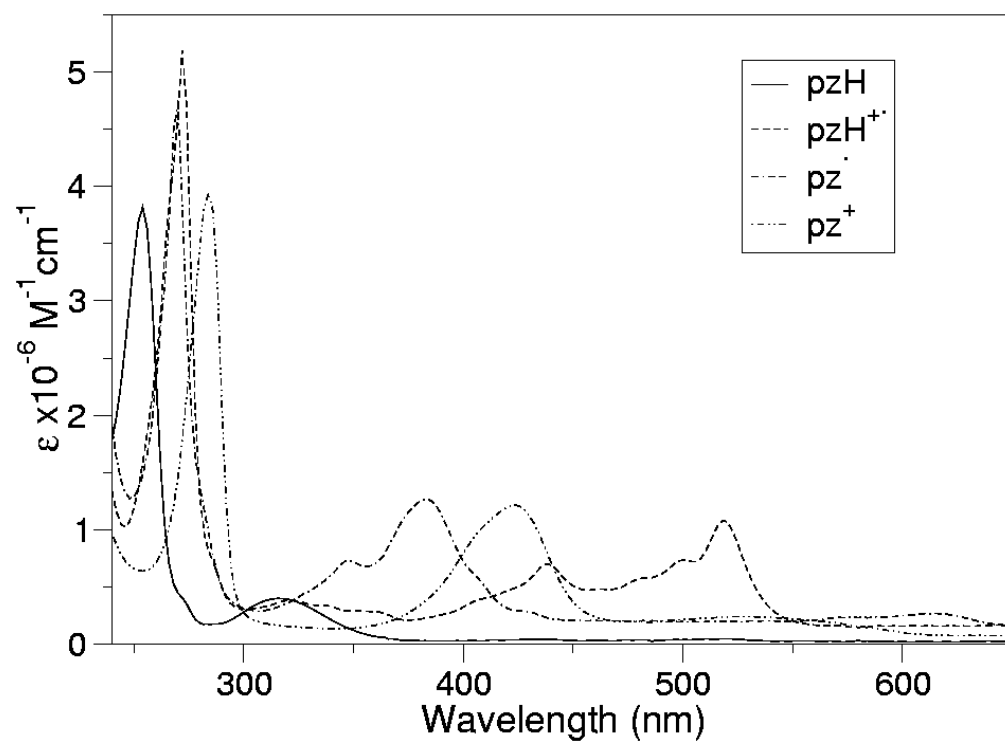

Supplement: pnas_0637229100_3.pdf [file pnas_0637229100_3.pdf]
